# Supplementary material for: A novel methodological approach for group classification during fission of a semi‐free‐ranging group of Japanese macaques (Macaca fuscata)
Source: PubMed Central journal article supplement — Am J Primatol. 2023 Jan 3;85(2):e23463. doi: 10.1002/ajp.23463 (PMC10078252; doi:10.1002/ajp.23463), 2023-01-03
Supplement: AJP-85-0-s007.pdf [file AJP-85-0-s007.pdf]

# Final group division

Threshold-values:

Independence of behaviour: Mean cofeeding + 2SD  
 Participation in group movements: Mean participation +1SD  
 Separation of nomadic ranges: Mean co-appearance +2SD

Total number of group members:

| Main group | Sub-group | Undetermined |
|------------|-----------|--------------|
| 33         | 36        | 56           |

| MAIN GROUP:   |                   |     |             |           |
|---------------|-------------------|-----|-------------|-----------|
| Name          | Geneological name | Sex | Age         | Matriline |
| Alice         | SIVICH-09         | f   | 10,95       | 8         |
| Amanda        | AMANDA-93         | f   | 27,19166667 | 11        |
| Augustin      | NI-01             | m   | 18,87222222 | 7         |
| Augustine     | MO-04             | f   | 15,53611111 | 6         |
| Barbara       | PA-00             | f   | 19,92222222 | 2         |
| Bettina       | ROKRCAEL-13       | f   | 6,783333333 | 10        |
| Bum Bum       | MAUL-02           | f   | 17,78611111 | 3         |
| Conchita      | MOLIRO-14         | f   | 5,825       | 6         |
| Funki         | GUJO-07           | m   | 12,85833333 | 5         |
| Heidi         | PAIR-07           | f   | 12,83055556 | 2         |
| Herta         | MOME-12           | f   | 7,877777778 | 6         |
| Hilde         | SIVICH-06         | f   | 13,83888889 | 8         |
| Iris          | PA-01             | f   | 18,84444444 | 2         |
| Janis         | SIVICHHI-14       | f   | 5,891666667 | 8         |
| Jessy         | PAIR-10           | f   | 9,836111111 | 2         |
| Julia         | MOAU-12           | f   | 7,880555556 | 6         |
| Julius        | AN-02             | m   | 17,85555556 | 9         |
| Kate          | PABAMA-11         | f   | 8,902777778 | 2         |
| Kurt          | PAIRHE-14         | f   | 5,883333333 | 2         |
| Lucky         | PAPI-06           | m   | 13,74722222 | 2         |
| Marianne      | PABA-04           | f   | 15,80833333 | 2         |
| Marylin       | PABAHAMO-14       | f   | 5,816666667 | 2         |
| Melanie       | MO-06             | f   | 13,775      | 6         |
| Momo          | ANAN-09           | m   | 10,93055556 | 9         |
| Montana       | PABAHA-10         | f   | 9,811111111 | 2         |
| Richi         | RORE-03           | m   | 16,79722222 | 10        |
| Romana        | MOLI-09           | f   | 10,77777778 | 6         |
| Spooky        | CHMILE-12         | m   | 7,944444444 | 4         |
| Swen          | ROKRSV-08         | m   | 11,89722222 | 10        |
| Thomas        | PABA-08           | m   | 11,825      | 2         |
| Ulrike        | MA-98             | f   | 21,7        | 3         |
| Uschi         | SIVICHHI-12       | f   | 7,927777778 | 8         |
| Zarah Leander | SIVICHAL-15       | f   | 4,891666667 | 8         |

| SUB-GROUP: |                   |     |     |           |
|------------|-------------------|-----|-----|-----------|
| Name       | Geneological name | Sex | Age | Matriline |

|                  |             |   |             |    |
|------------------|-------------|---|-------------|----|
| Aaron            | INRUSA-10   | m | 9,825       | 12 |
| Adrian           | MI-99       | m | 20,75277778 | 14 |
| Aiko             | ANAN-11     | m | 8,919444444 | 9  |
| Amy              | INRUSA-14   | f | 5,894444444 | 12 |
| Betty            | NI-99       | f | 20,83055556 | 7  |
| Chanel           | NINI-09     | f | 10,82222222 | 7  |
| Chita            | CHITA-92    | f | 28,19166667 | 4  |
| Chris Cross      | SIVICHAL-13 | m | 6,891666667 | 13 |
| Dieter           | ANSA-08     | m | 11,88333333 | 9  |
| Double U         | CH-98       | m | 21,775      | 4  |
| Elisabeth Taylor | FA-15       | f | 4,808333333 | 13 |
| Eva              | INRUSA-12   | f | 7,808333333 | 12 |
| Ferdinand        | GI-00       | m | 19,87222222 | 16 |
| Florentine       | INRU-09     | f | 10,88611111 | 12 |
| Franziskus       | MOME-10     | m | 9,747222222 | 6  |
| Friderike        | NINI-06     | f | 13,78611111 | 7  |
| Grace            | INRUFL-15   | f | 4,858333333 | 12 |
| Greta            | NIBEAL-15   | f | 4,816666667 | 7  |
| Heinz            | GULI-10     | m | 9,788888889 | 5  |
| Ilvy             | NIBE-07     | f | 12,88611111 | 7  |
| Jackson          | GUJO-09     | m | 10,68333333 | 5  |
| Karl-Vinzenz     | RO-00       | m | 20,08611111 | 10 |
| Kuddl Muddl      | AMANMA-11   | m | 8,788888889 | 11 |
| Lucy             | NINIFR-13   | f | 6,875       | 7  |
| Magdalena        | CHMILE-09   | f | 10,975      | 4  |
| Marlene D.       | NIBEIL-15   | f | 4,858333333 | 7  |
| Mickey           | AN-96       | m | 24,19166667 | 9  |
| Minni            | CH-96       | f | 23,85833333 | 4  |
| Nico             | PAPI-08     | m | 11,91944444 | 2  |
| Nils-Gerlos      | NI-02       | f | 17,78888889 | 7  |
| Pauli            | MA-00       | m | 19,90555556 | 3  |
| Rupi             | MOAU-11     | m | 8,894444444 | 6  |
| Sabine           | INRU-05     | f | 14,82777778 | 12 |
| Sailormoon       | NINIFRZO-16 | f | 3,852777778 | 7  |
| William          | MAULBU-11   | m | 8,927777778 | 3  |
| Zoey             | NINIFR-11   | f | 8,877777778 | 7  |

**UNDETERMINED:**

| Name            | Geneological name | Sex | Age   | Matriline |
|-----------------|-------------------|-----|-------|-----------|
| Anastasia       | ANASTASIA-87      | f   | 33,19 | 9         |
| Beate           | MOLI-06           | f   | 13,83 | 6         |
| Bernhard        | MAULBU-12         | m   | 7,79  | 3         |
| Berta           | GUJO-05           | f   | 14,89 | 5         |
| Caroline        | ROKR-01           | f   | 18,89 | 10        |
| Catwoman        | ROKRCAELBE-16     | f   | 3,76  | 10        |
| Charlie Chaplin | AMANMA-15         | m   | 4,88  | 11        |
| Claudia         | GULI-09           | f   | 10,98 | 5         |
| Coco            | GUJOBE-09         | m   | 10,82 | 5         |
| Dolores         | ANST-05           | f   | 14,88 | 9         |
| Elektra         | MOLIBESA-16       | f   | 3,89  | 6         |

|               |               |   |       |    |
|---------------|---------------|---|-------|----|
| Elli          | GULI-07       | f | 12,80 | 5  |
| Elvis         | NIBEIL-14     | m | 5,92  | 7  |
| Falco         | NINICH-14     | m | 5,90  | 7  |
| Fanny         | FANNY-10      | f | 9,88  | 13 |
| Finn          | AMANMA-13     | m | 6,91  | 11 |
| Freddy        | MANAAL-14     | m | 5,78  | 3  |
| Gustav        | MINO-02       | m | 17,83 | 14 |
| Heiko         | MAULBU-07     | m | 12,89 | 3  |
| Hermine       | MOMEHE-16     | f | 3,78  | 6  |
| Holgerson     | NINI-08       | m | 11,86 | 7  |
| Humphrey      | GULICL-15     | m | 4,89  | 5  |
| Josephine     | GU-00         | f | 19,89 | 5  |
| Karl          | ROKRCA-08     | m | 11,90 | 10 |
| Kathi         | KATHI-91      | f | 29,19 | 15 |
| Krato         | MOLIBE-13     | f | 6,88  | 6  |
| Krümel        | RO-94         | f | 26,19 | 10 |
| Laura         | AN-99         | f | 20,89 | 9  |
| Leo           | PABA-09       | m | 10,84 | 2  |
| Lilly         | GU-01         | f | 18,77 | 5  |
| Lisa          | MO-01         | f | 18,83 | 6  |
| Lorenz        | GULIEL-13     | m | 6,91  | 5  |
| Louis         | INRUSA-15     | m | 4,85  | 12 |
| Ludwig        | ANLA-03       | m | 16,80 | 9  |
| Lupo          | MAAN-09       | m | 10,64 | 3  |
| Madeleine     | ANSTDO-13     | f | 6,87  | 9  |
| Manfred       | PAIR-09       | m | 10,89 | 2  |
| Marco         | KA-02         | m | 17,94 | 15 |
| Marlon Brando | ANSTDO-15     | m | 4,88  | 9  |
| Maya          | AMAN-07       | f | 12,85 | 11 |
| Michaela      | MICHAELA-92   | f | 28,19 | 14 |
| Mr. Pink      | ROKRCAELSI-15 | m | 4,88  | 10 |
| Nora          | MI-98         | f | 21,93 | 14 |
| Olga          | ROKRSV-06     | f | 13,87 | 10 |
| Pippi         | MAANAL-16     | f | 3,93  | 3  |
| Rudolfine     | IN-00         | f | 19,81 | 12 |
| Sakura        | ROKRSVOL-13   | f | 6,83  | 10 |
| Sandra        | GULIEL-11     | f | 8,85  | 5  |
| Siegfried     | SIVICH-10     | m | 9,76  | 8  |
| Silvio        | ANSTDO-11     | m | 8,79  | 9  |
| Simone        | ROKRCAEL-11   | f | 9,87  | 10 |
| Suzanna       | NIBEMA-10     | f | 9,88  | 7  |
| Tanja         | TANJA-94      | f | 26,19 | 17 |
| Toby          | ROKRCA-07     | m | 12,95 | 10 |
| Werner        | ANST-08       | m | 11,89 | 9  |
| Wicky         | NIBEIL-12     | m | 7,93  | 7  |
