# Supplementary figures and images for: A novel methodological approach for group classification during fission of a semi‐free‐ranging group of Japanese macaques (Macaca fuscata)
Source: PubMed Central journal article supplement — Am J Primatol. 2023 Jan 3;85(2):e23463. doi: 10.1002/ajp.23463 (PMC10078252; doi:10.1002/ajp.23463), 2023-01-03

a)

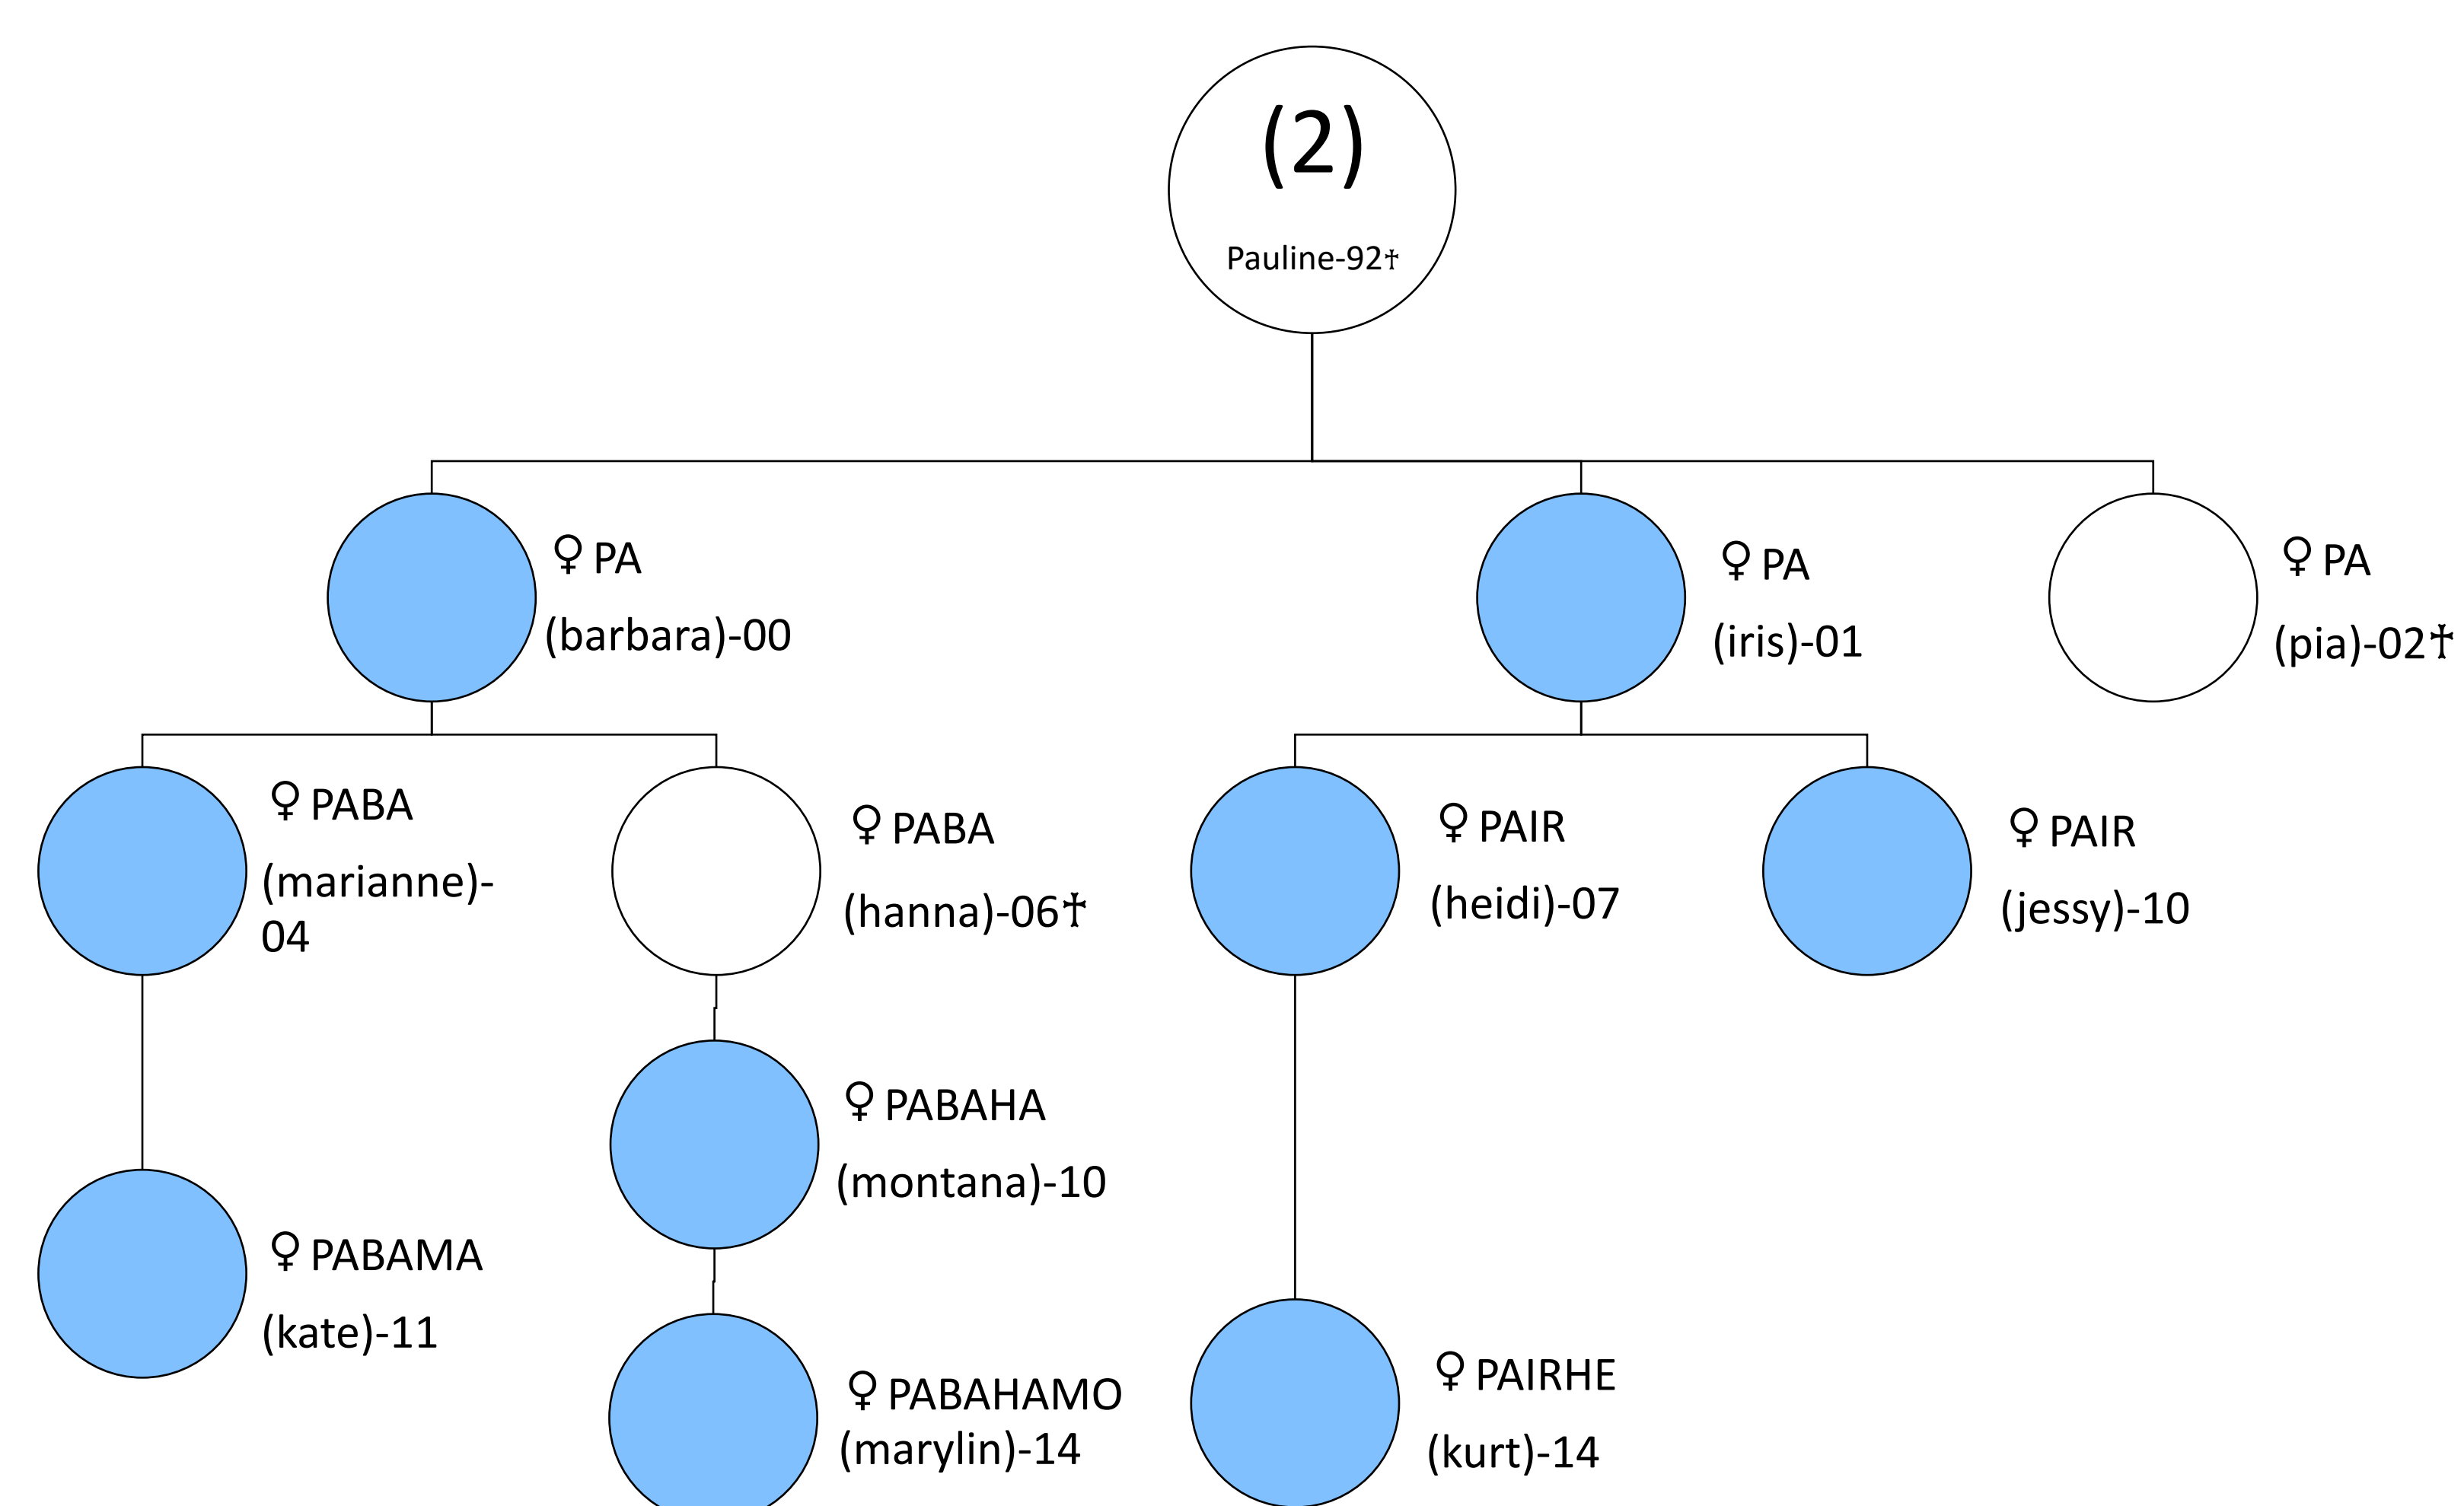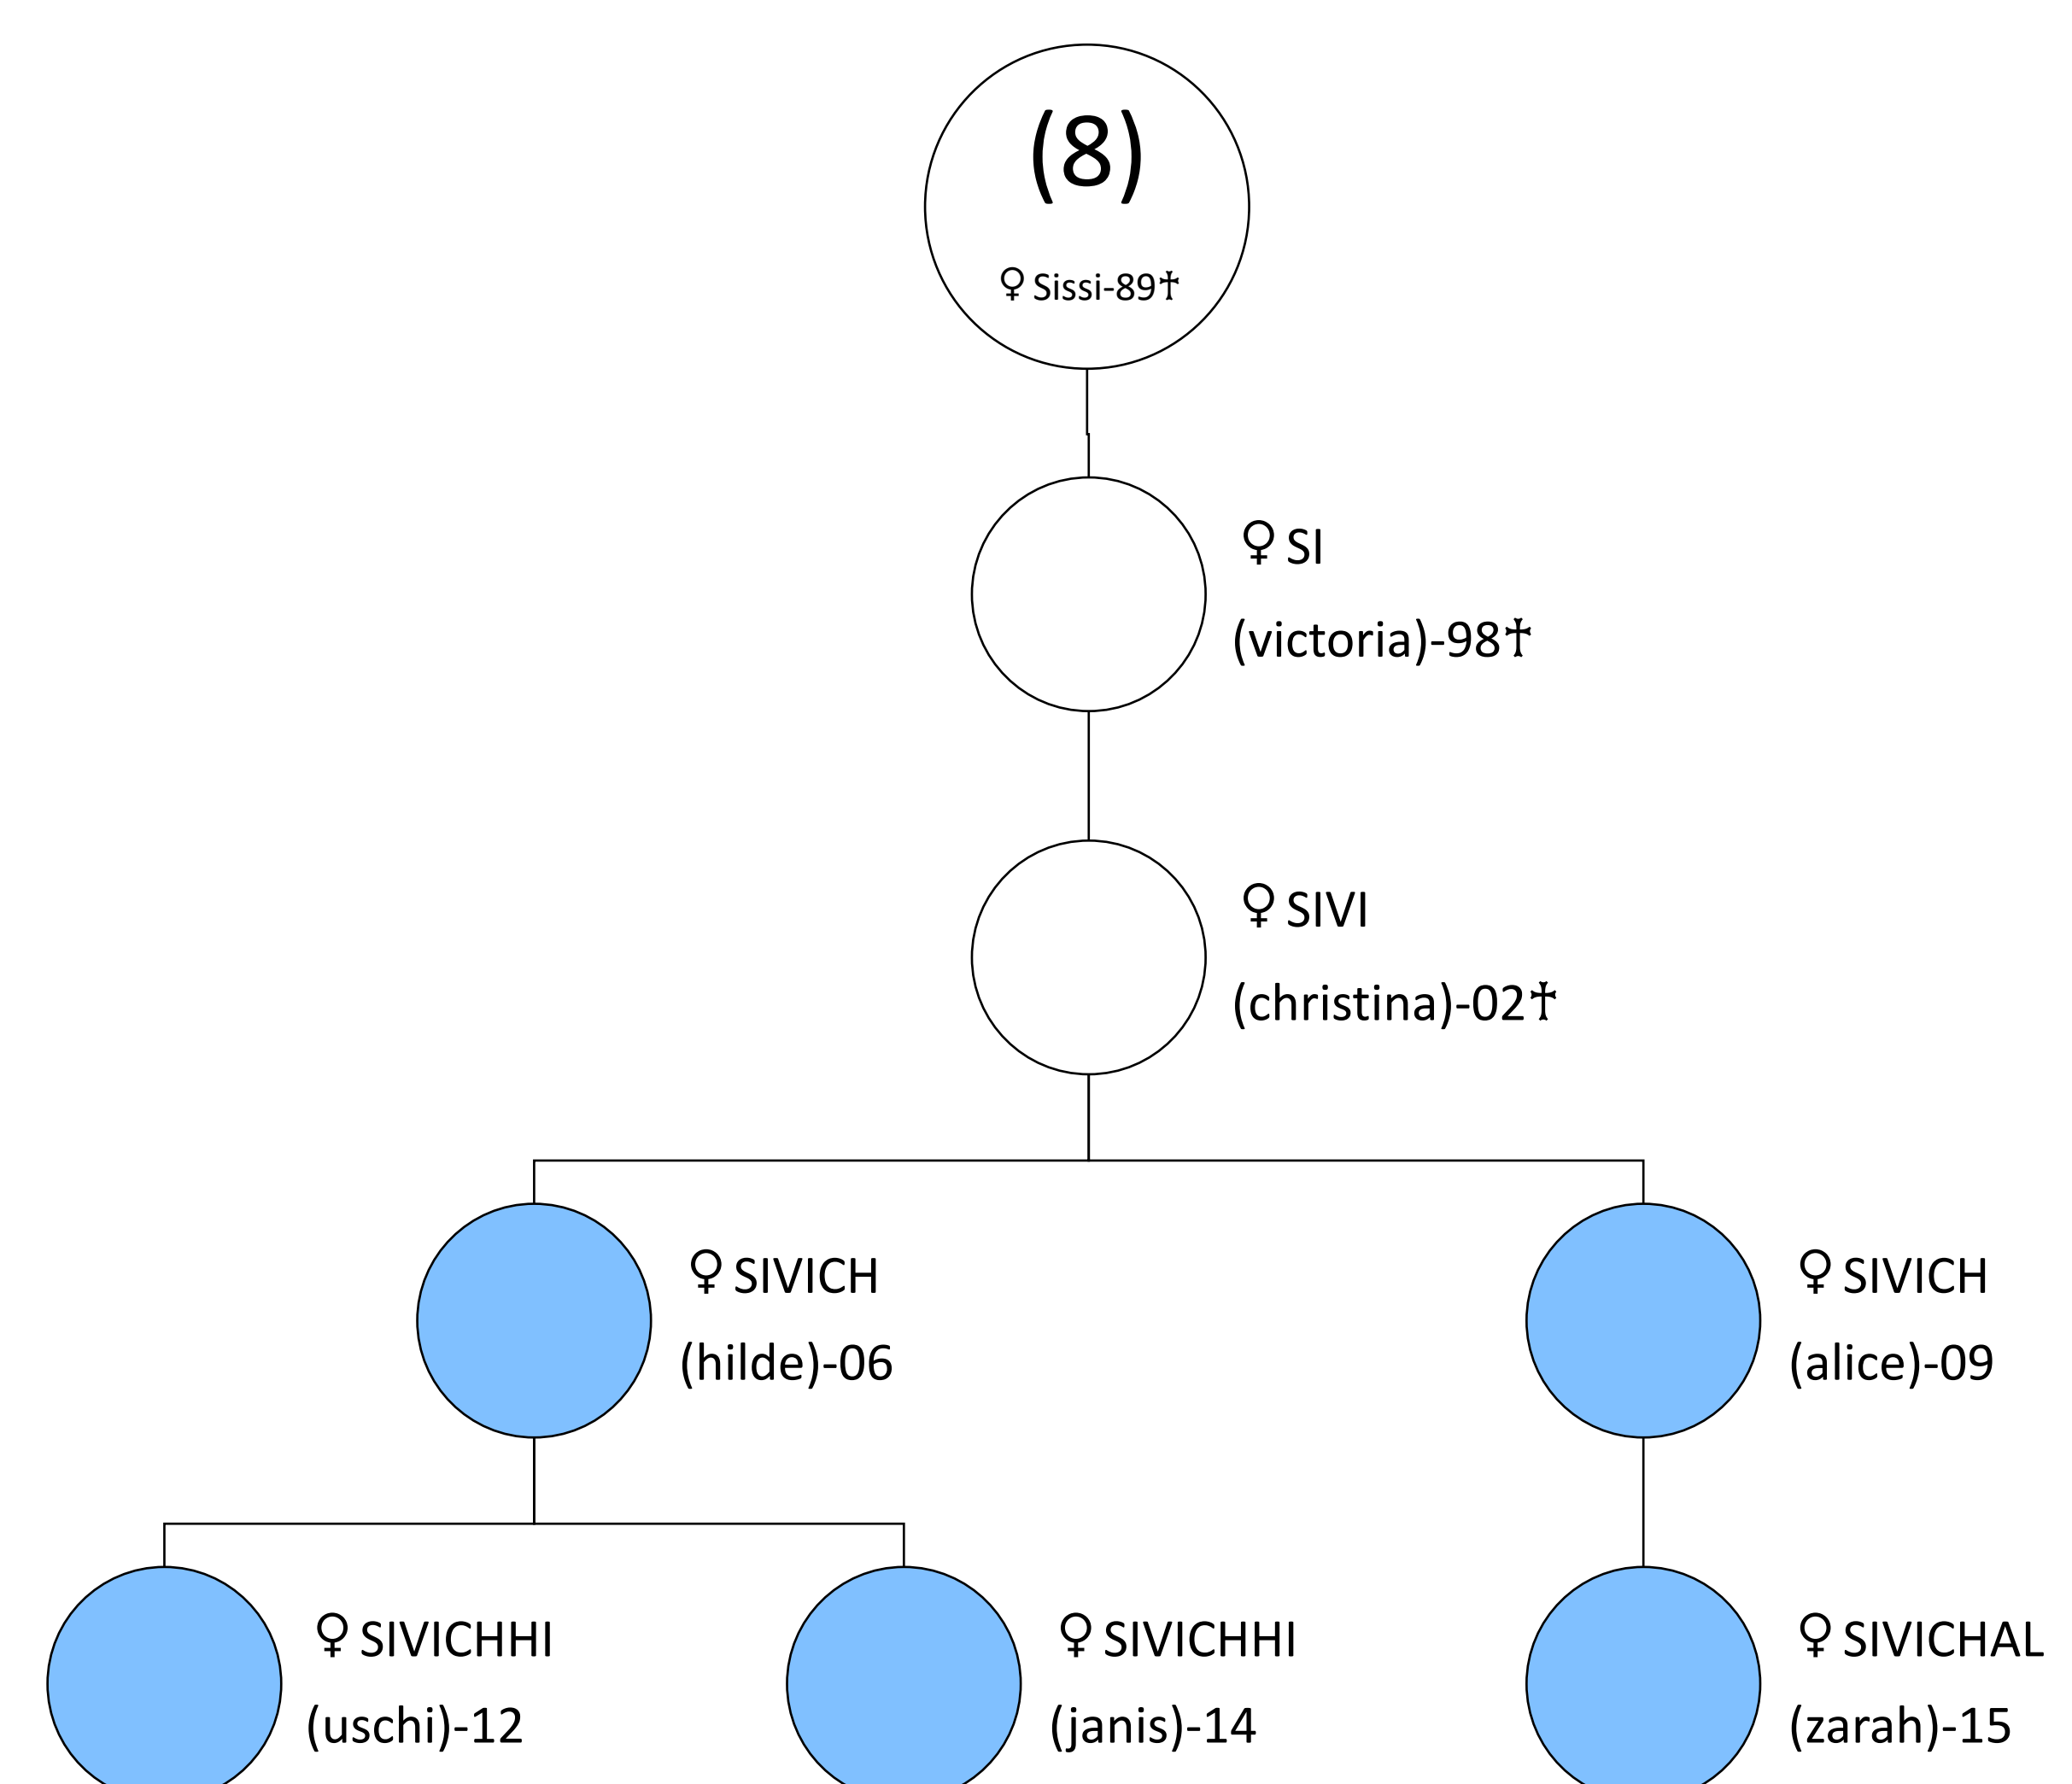

b)

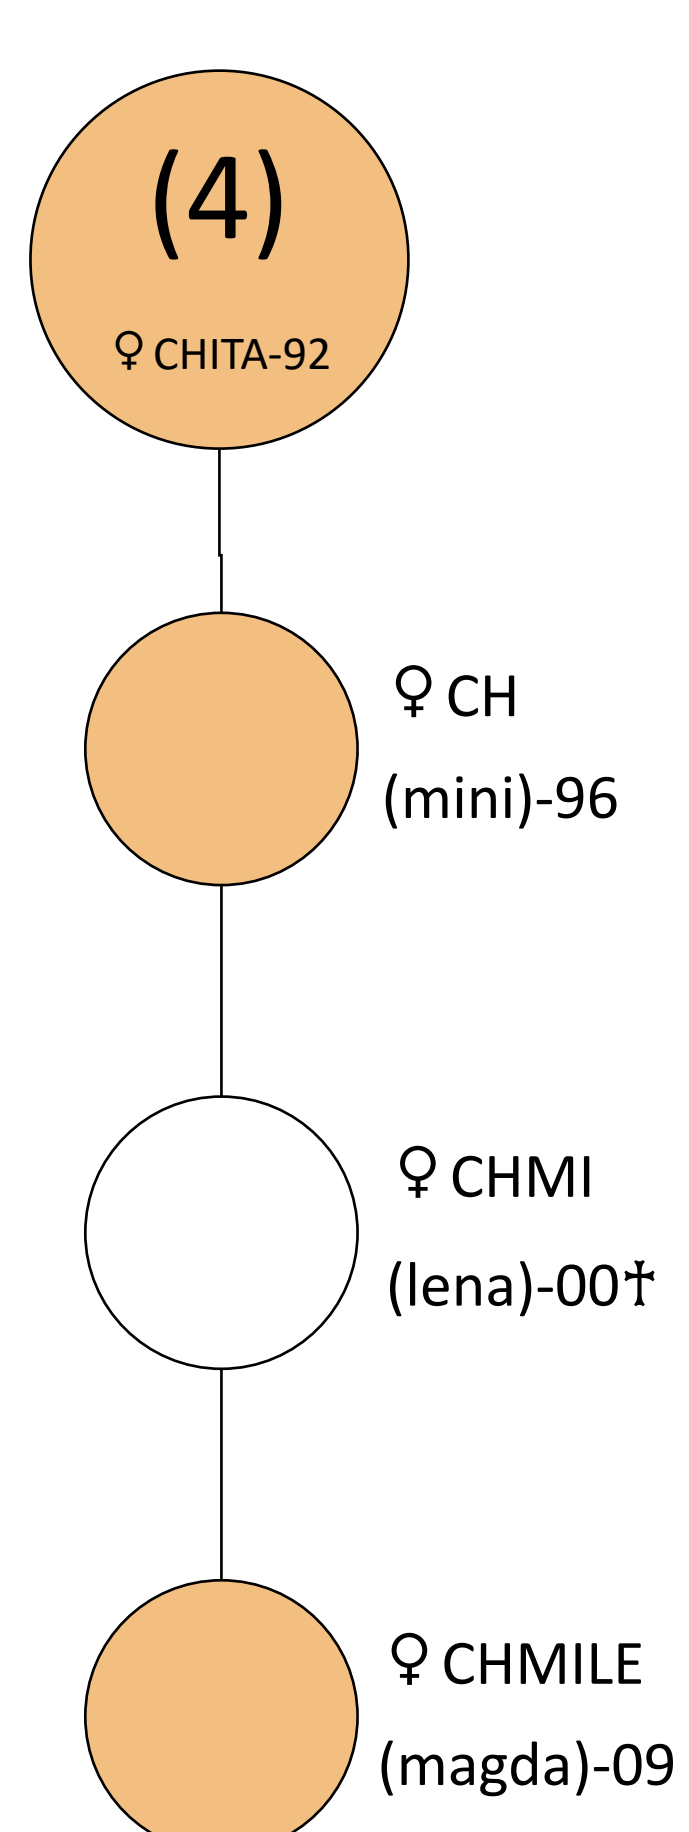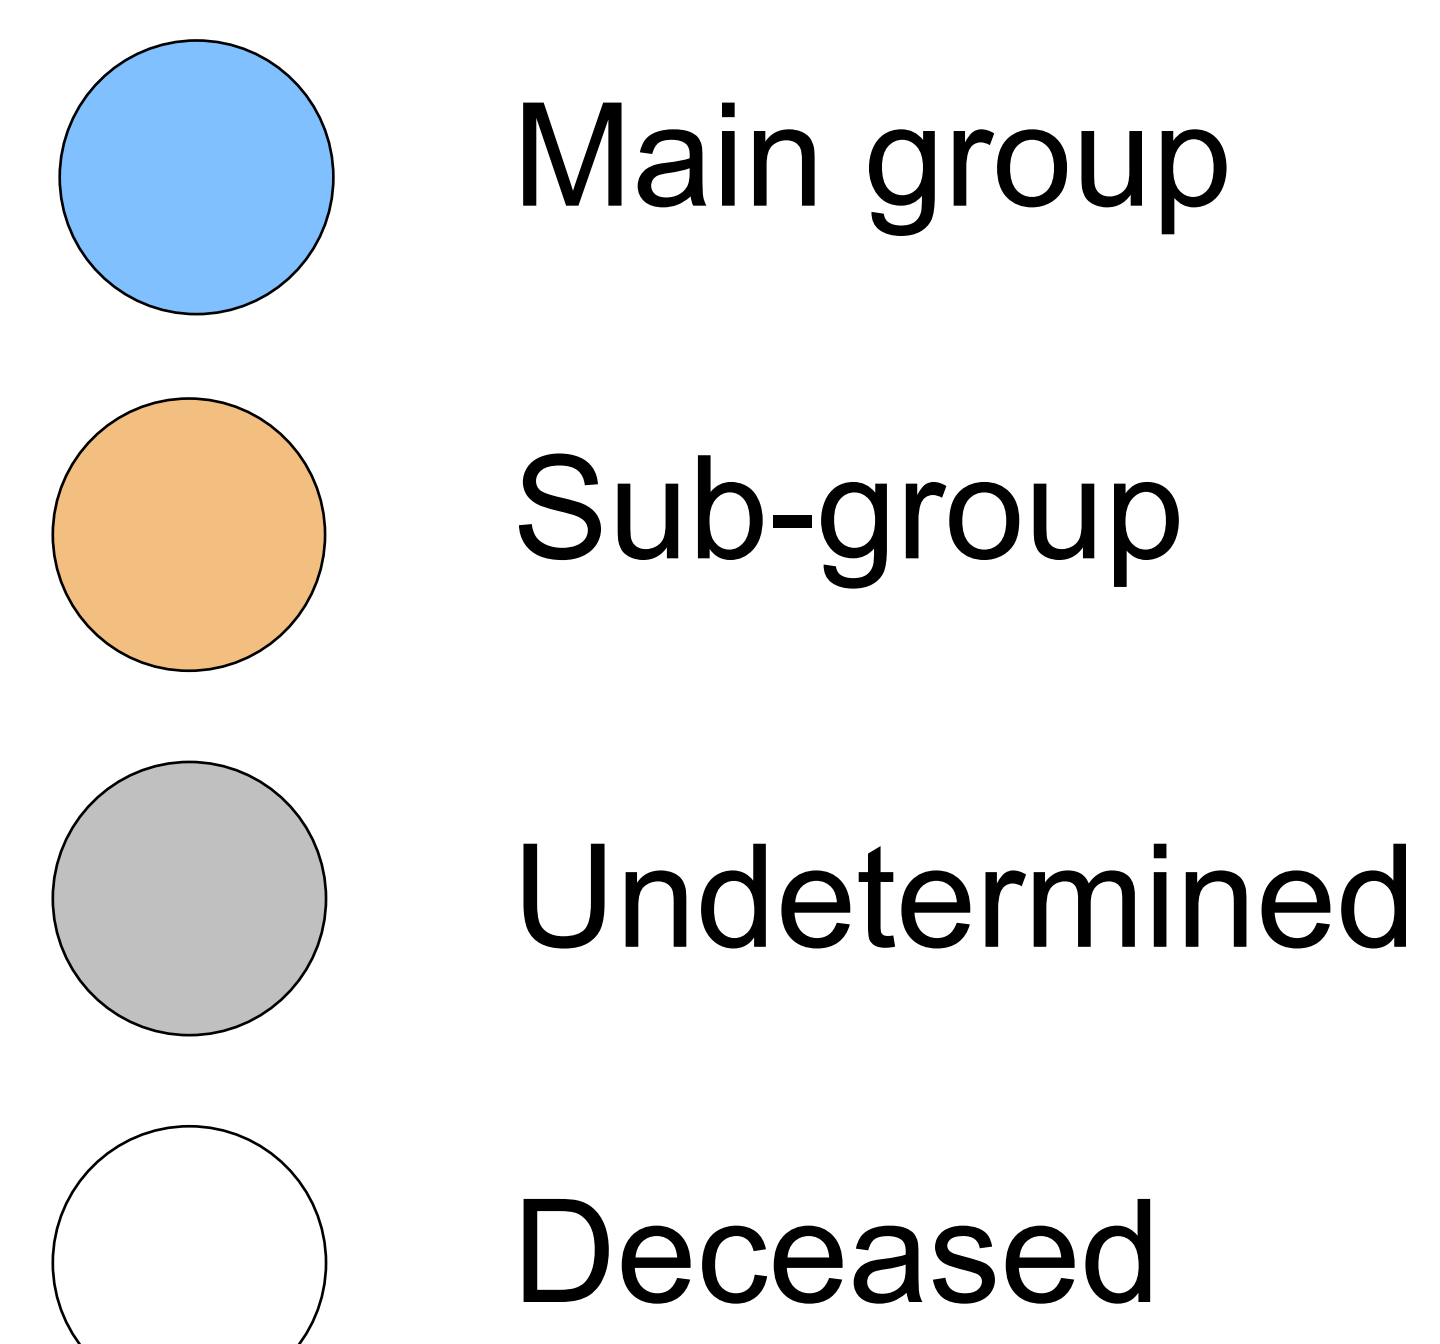

(2) highest ranked lineage  
(14) lowest ranked lineage

c)

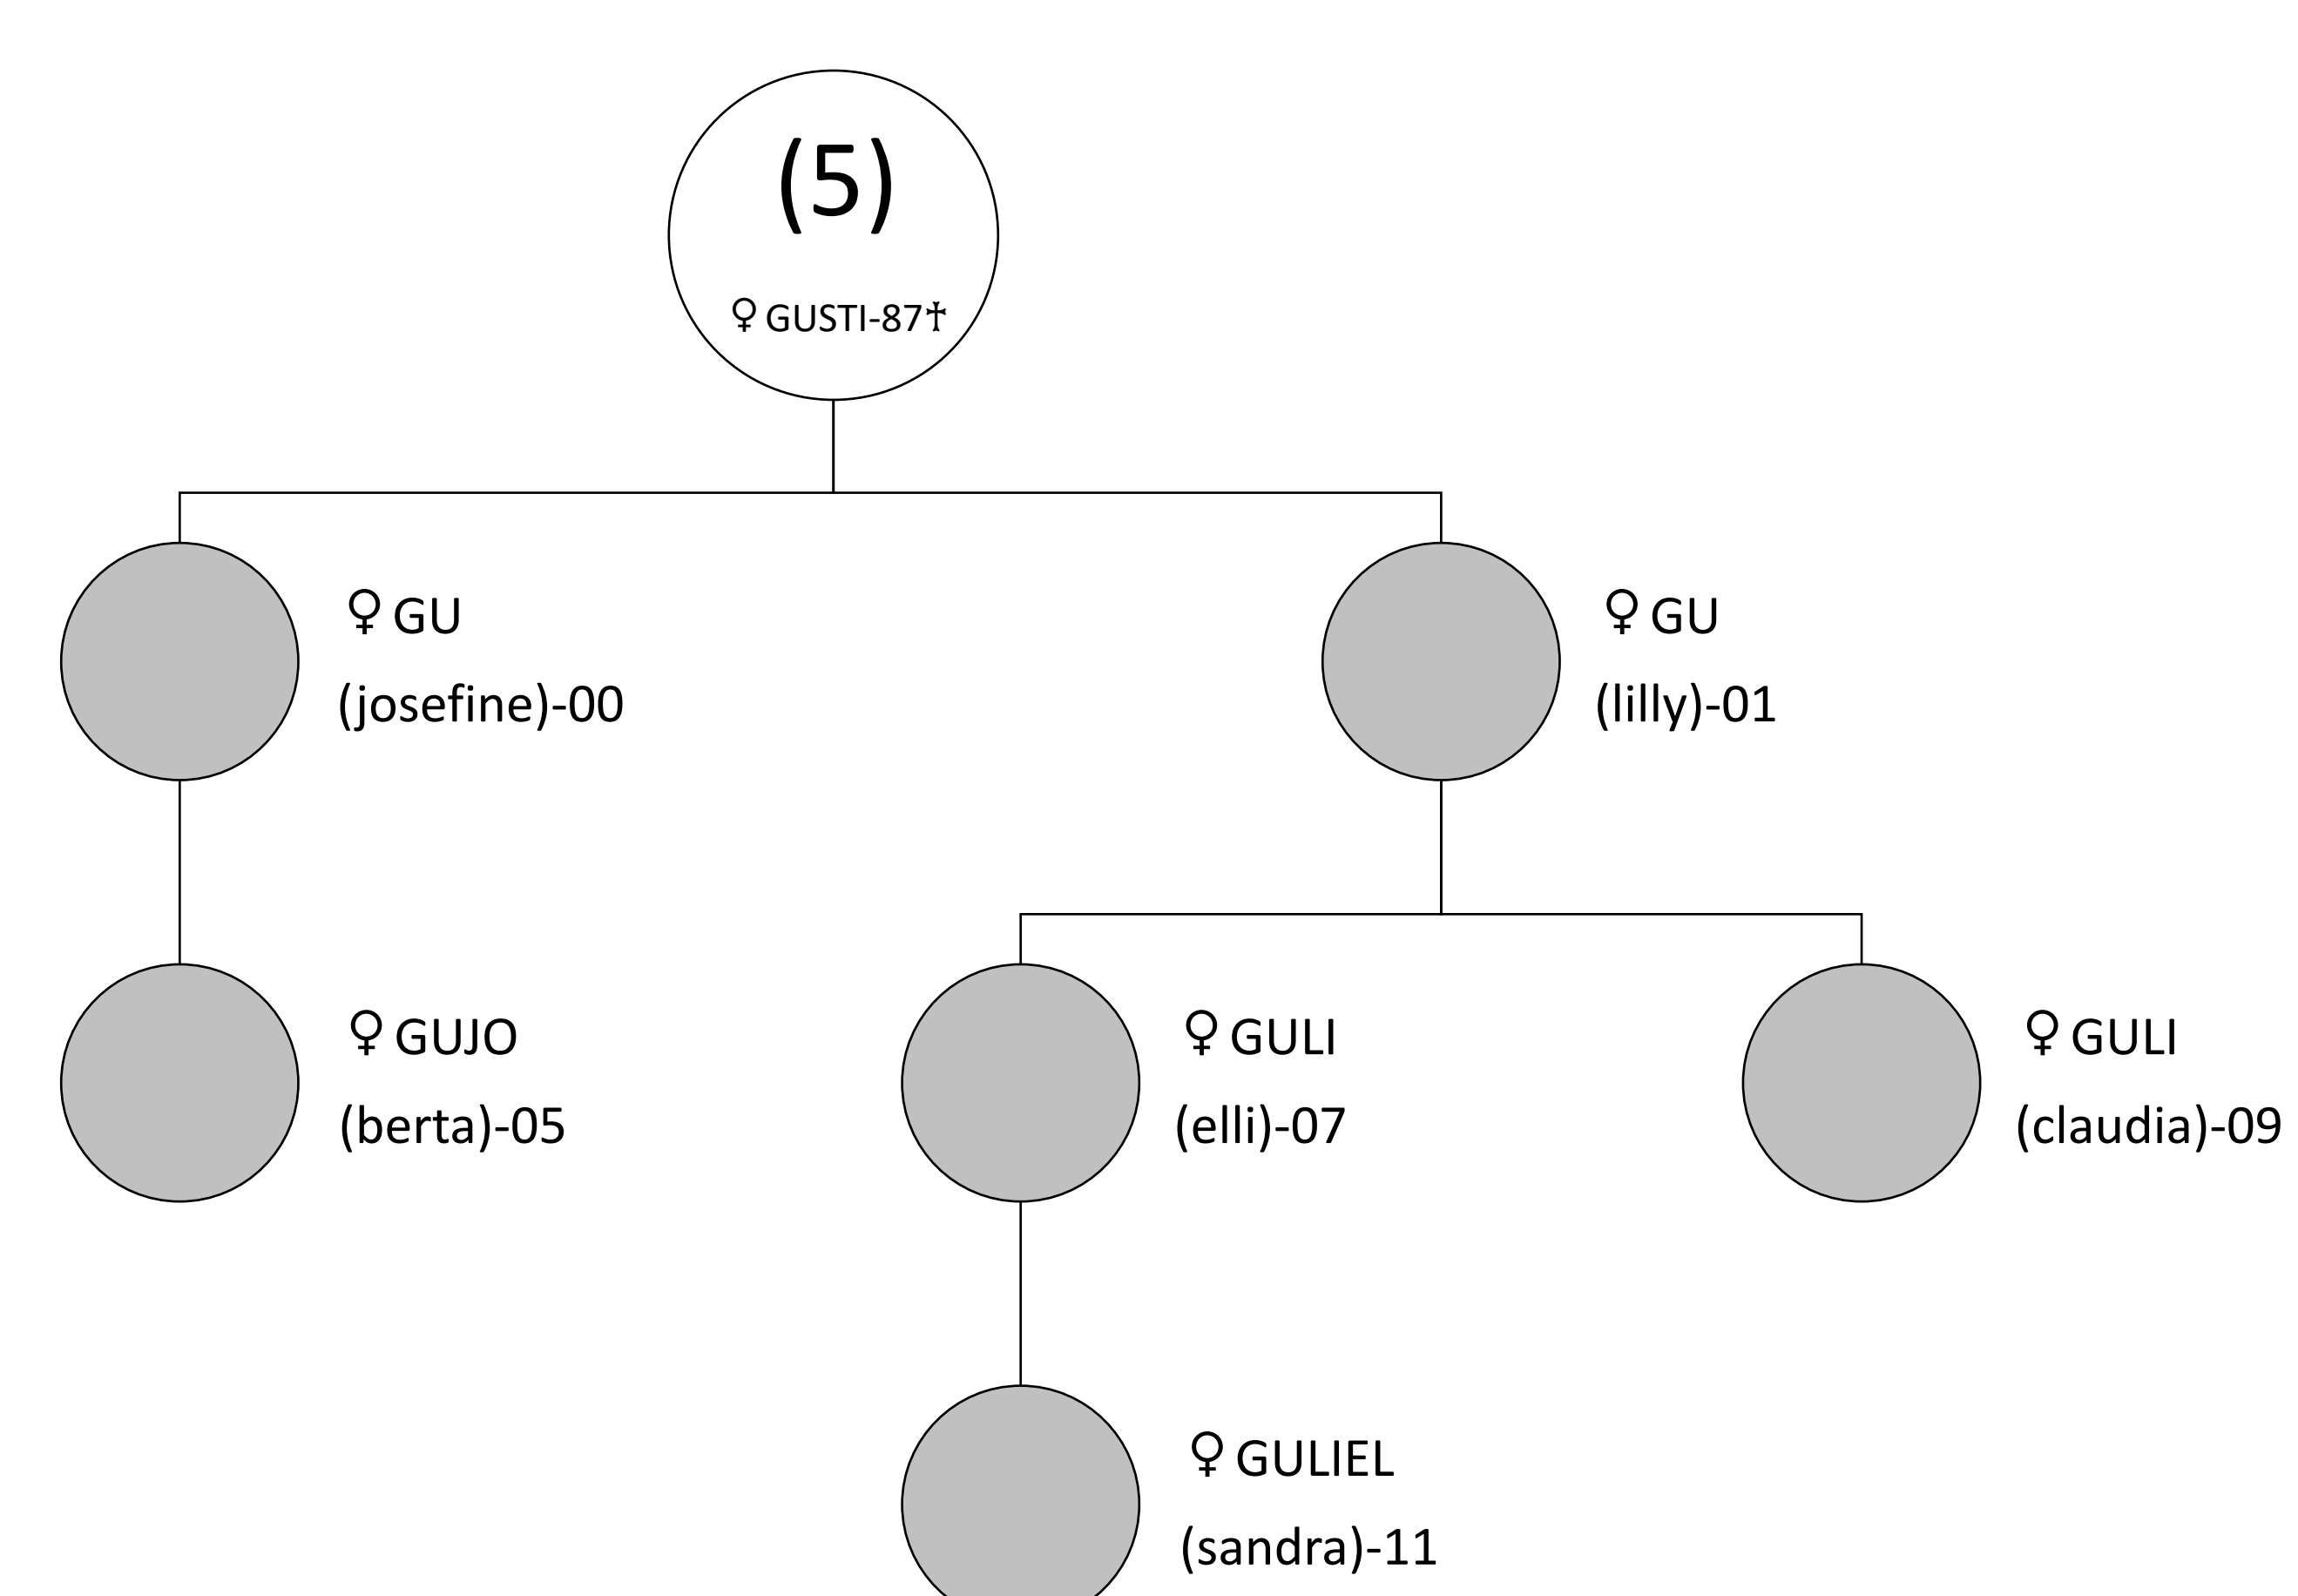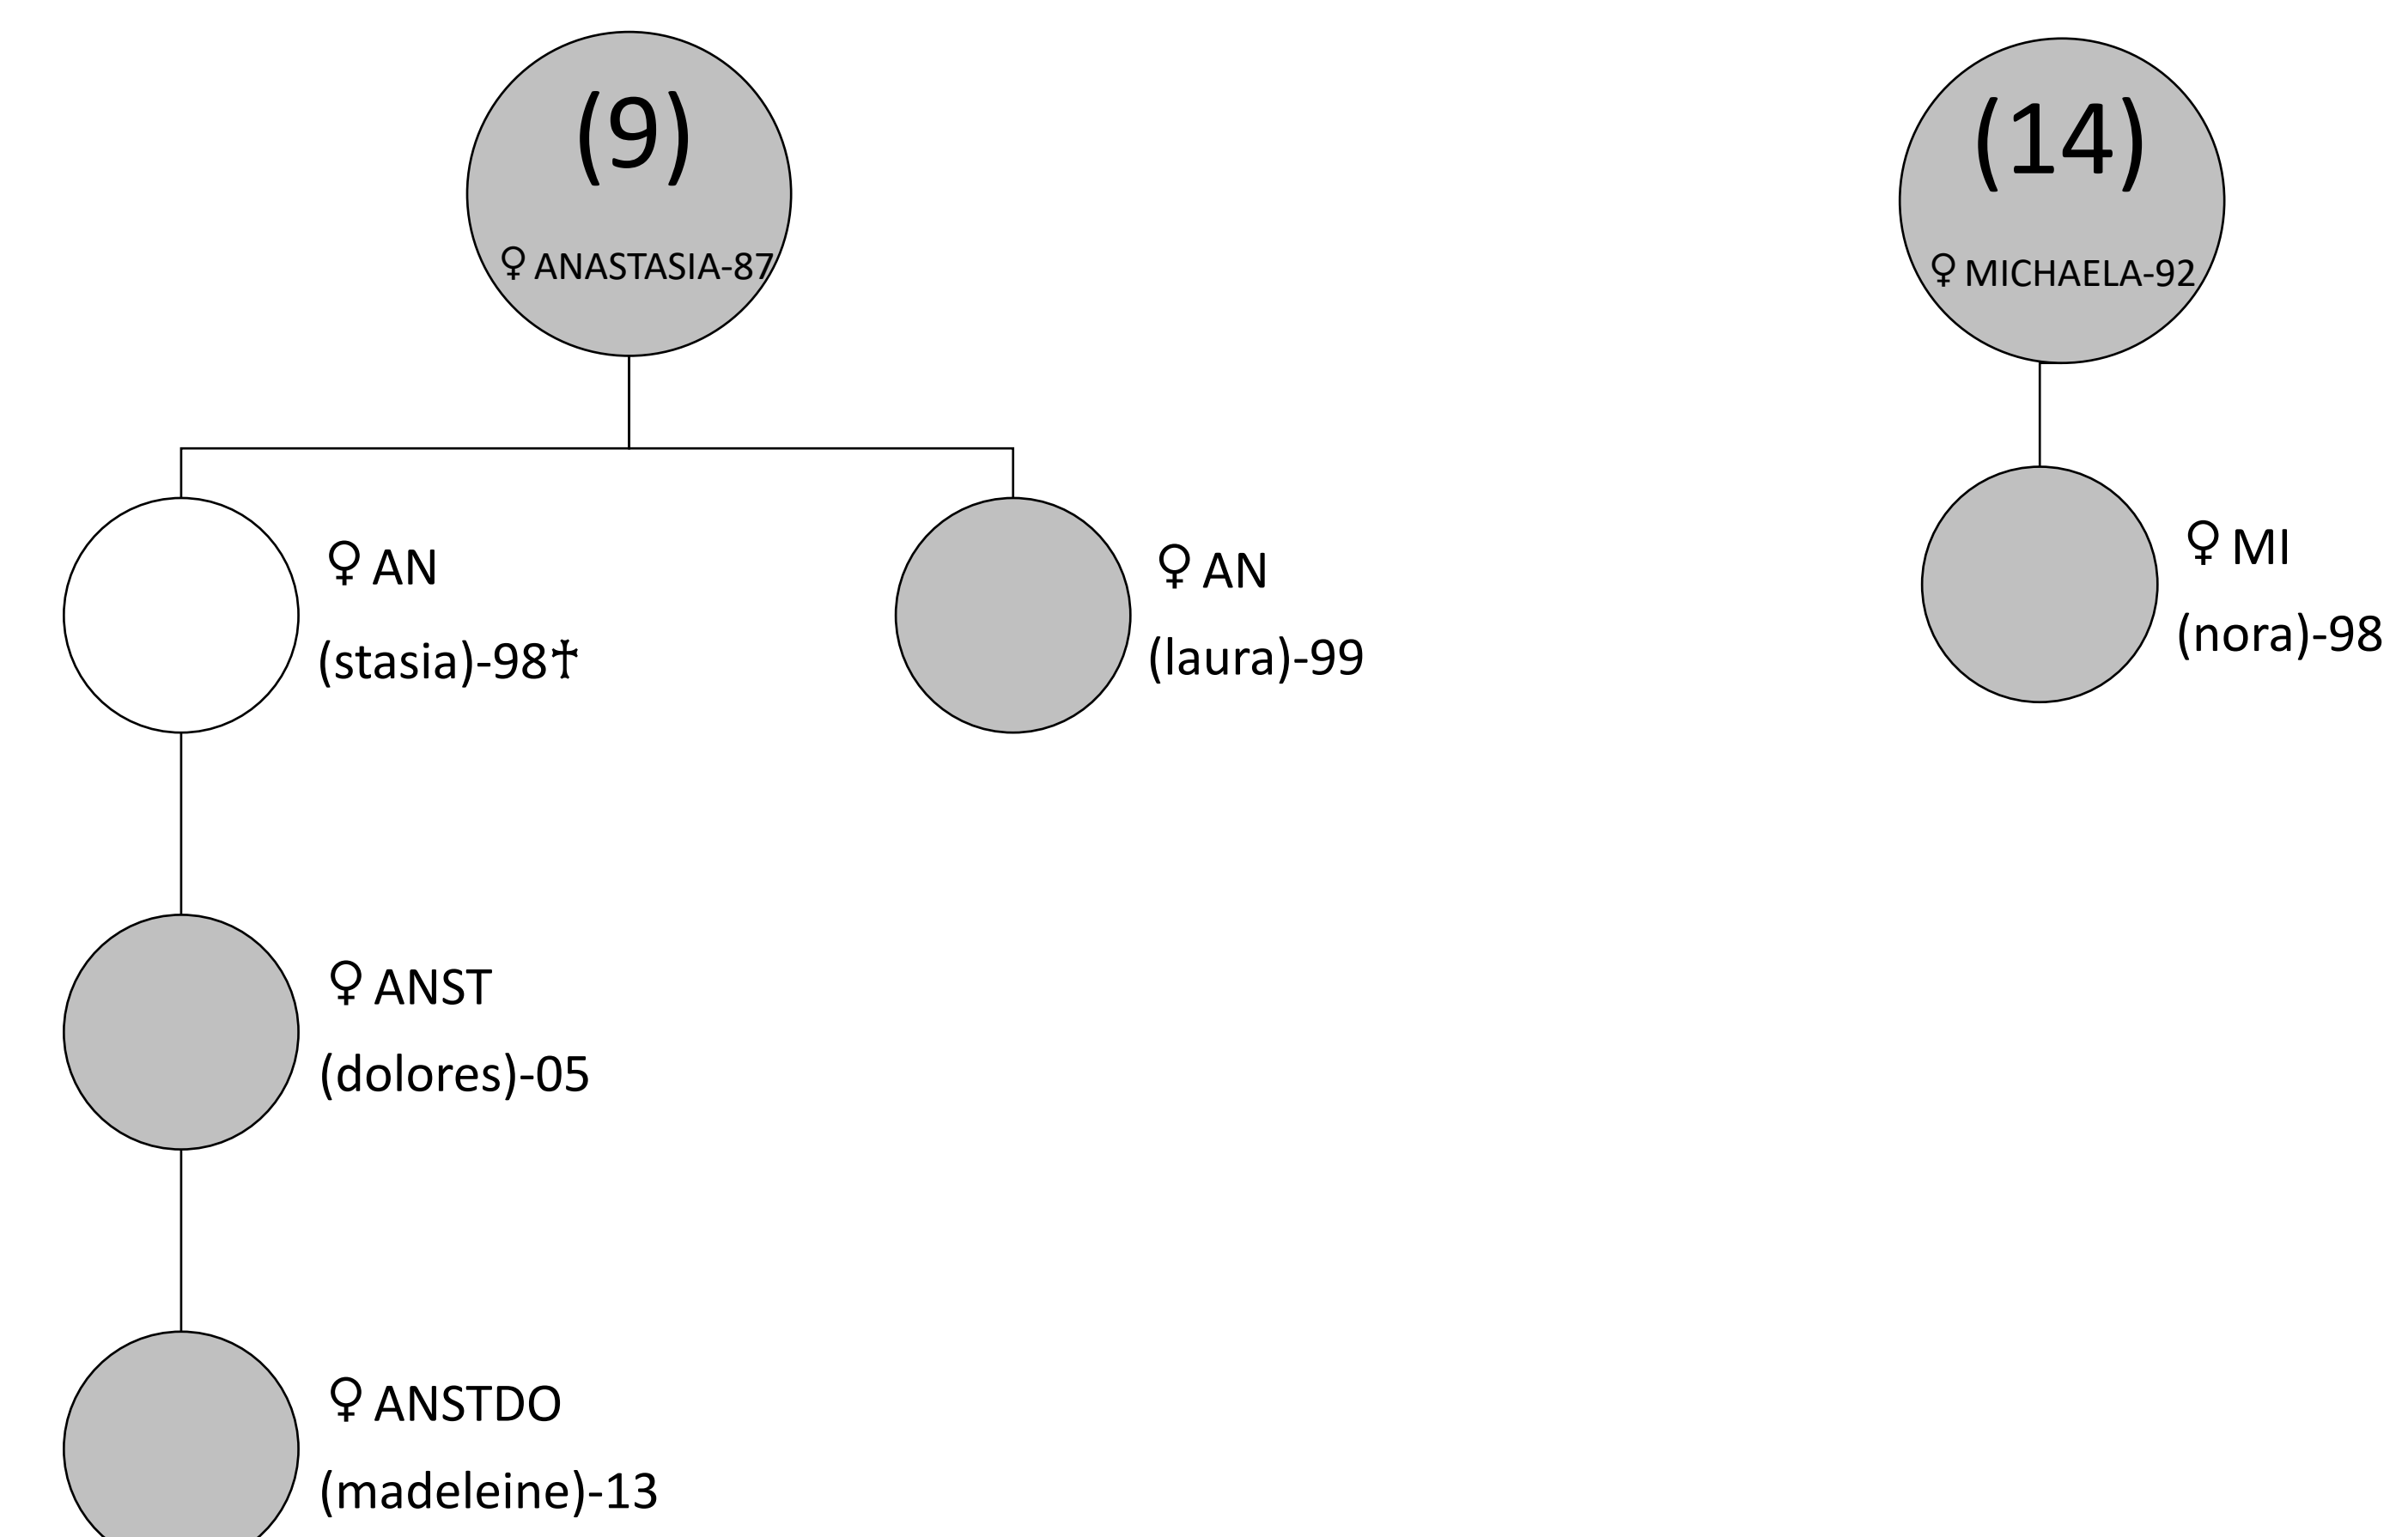

d)

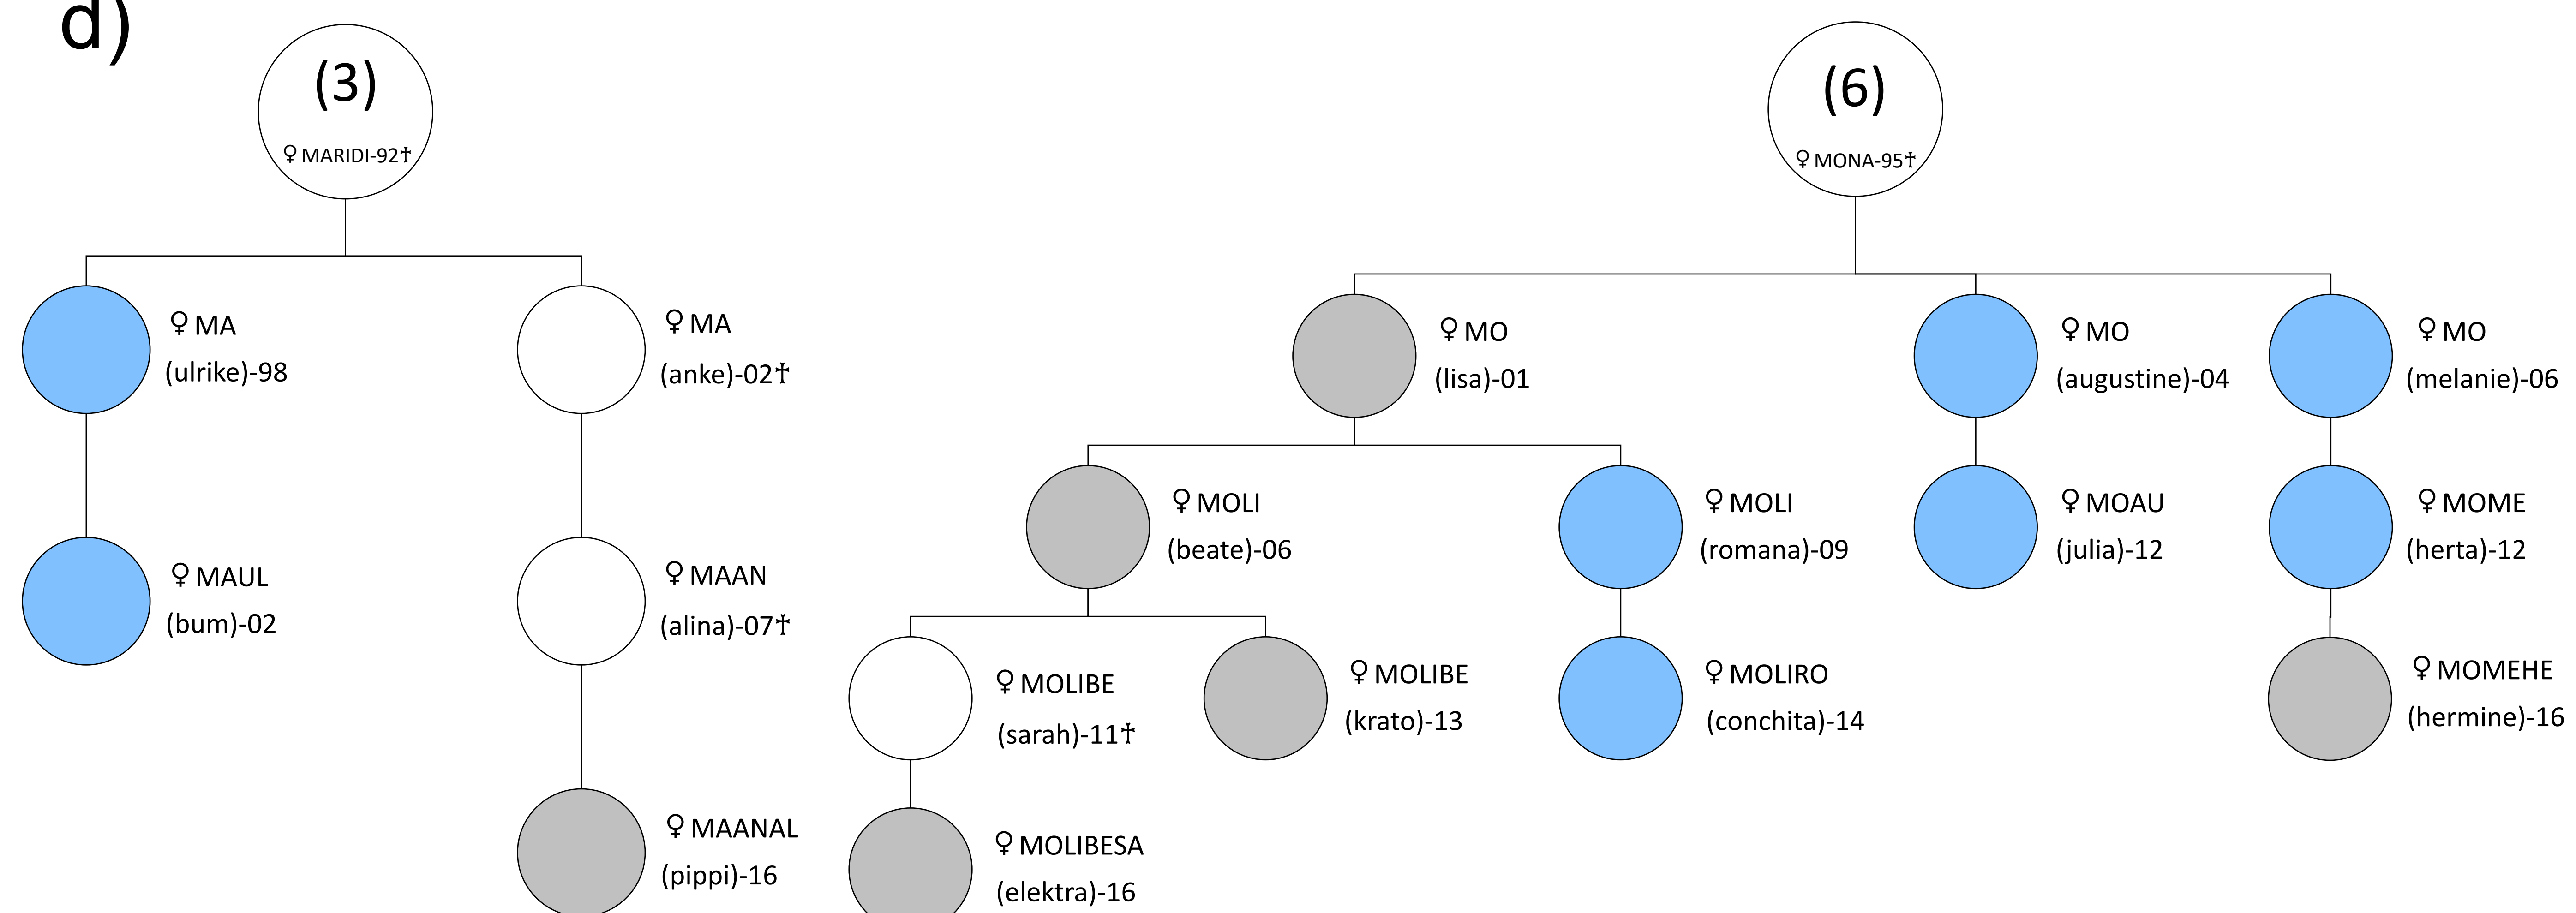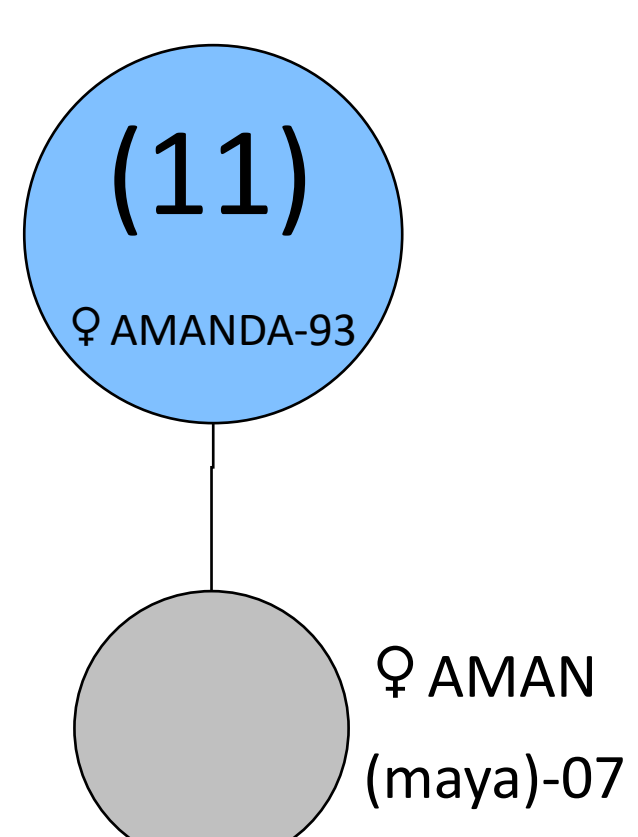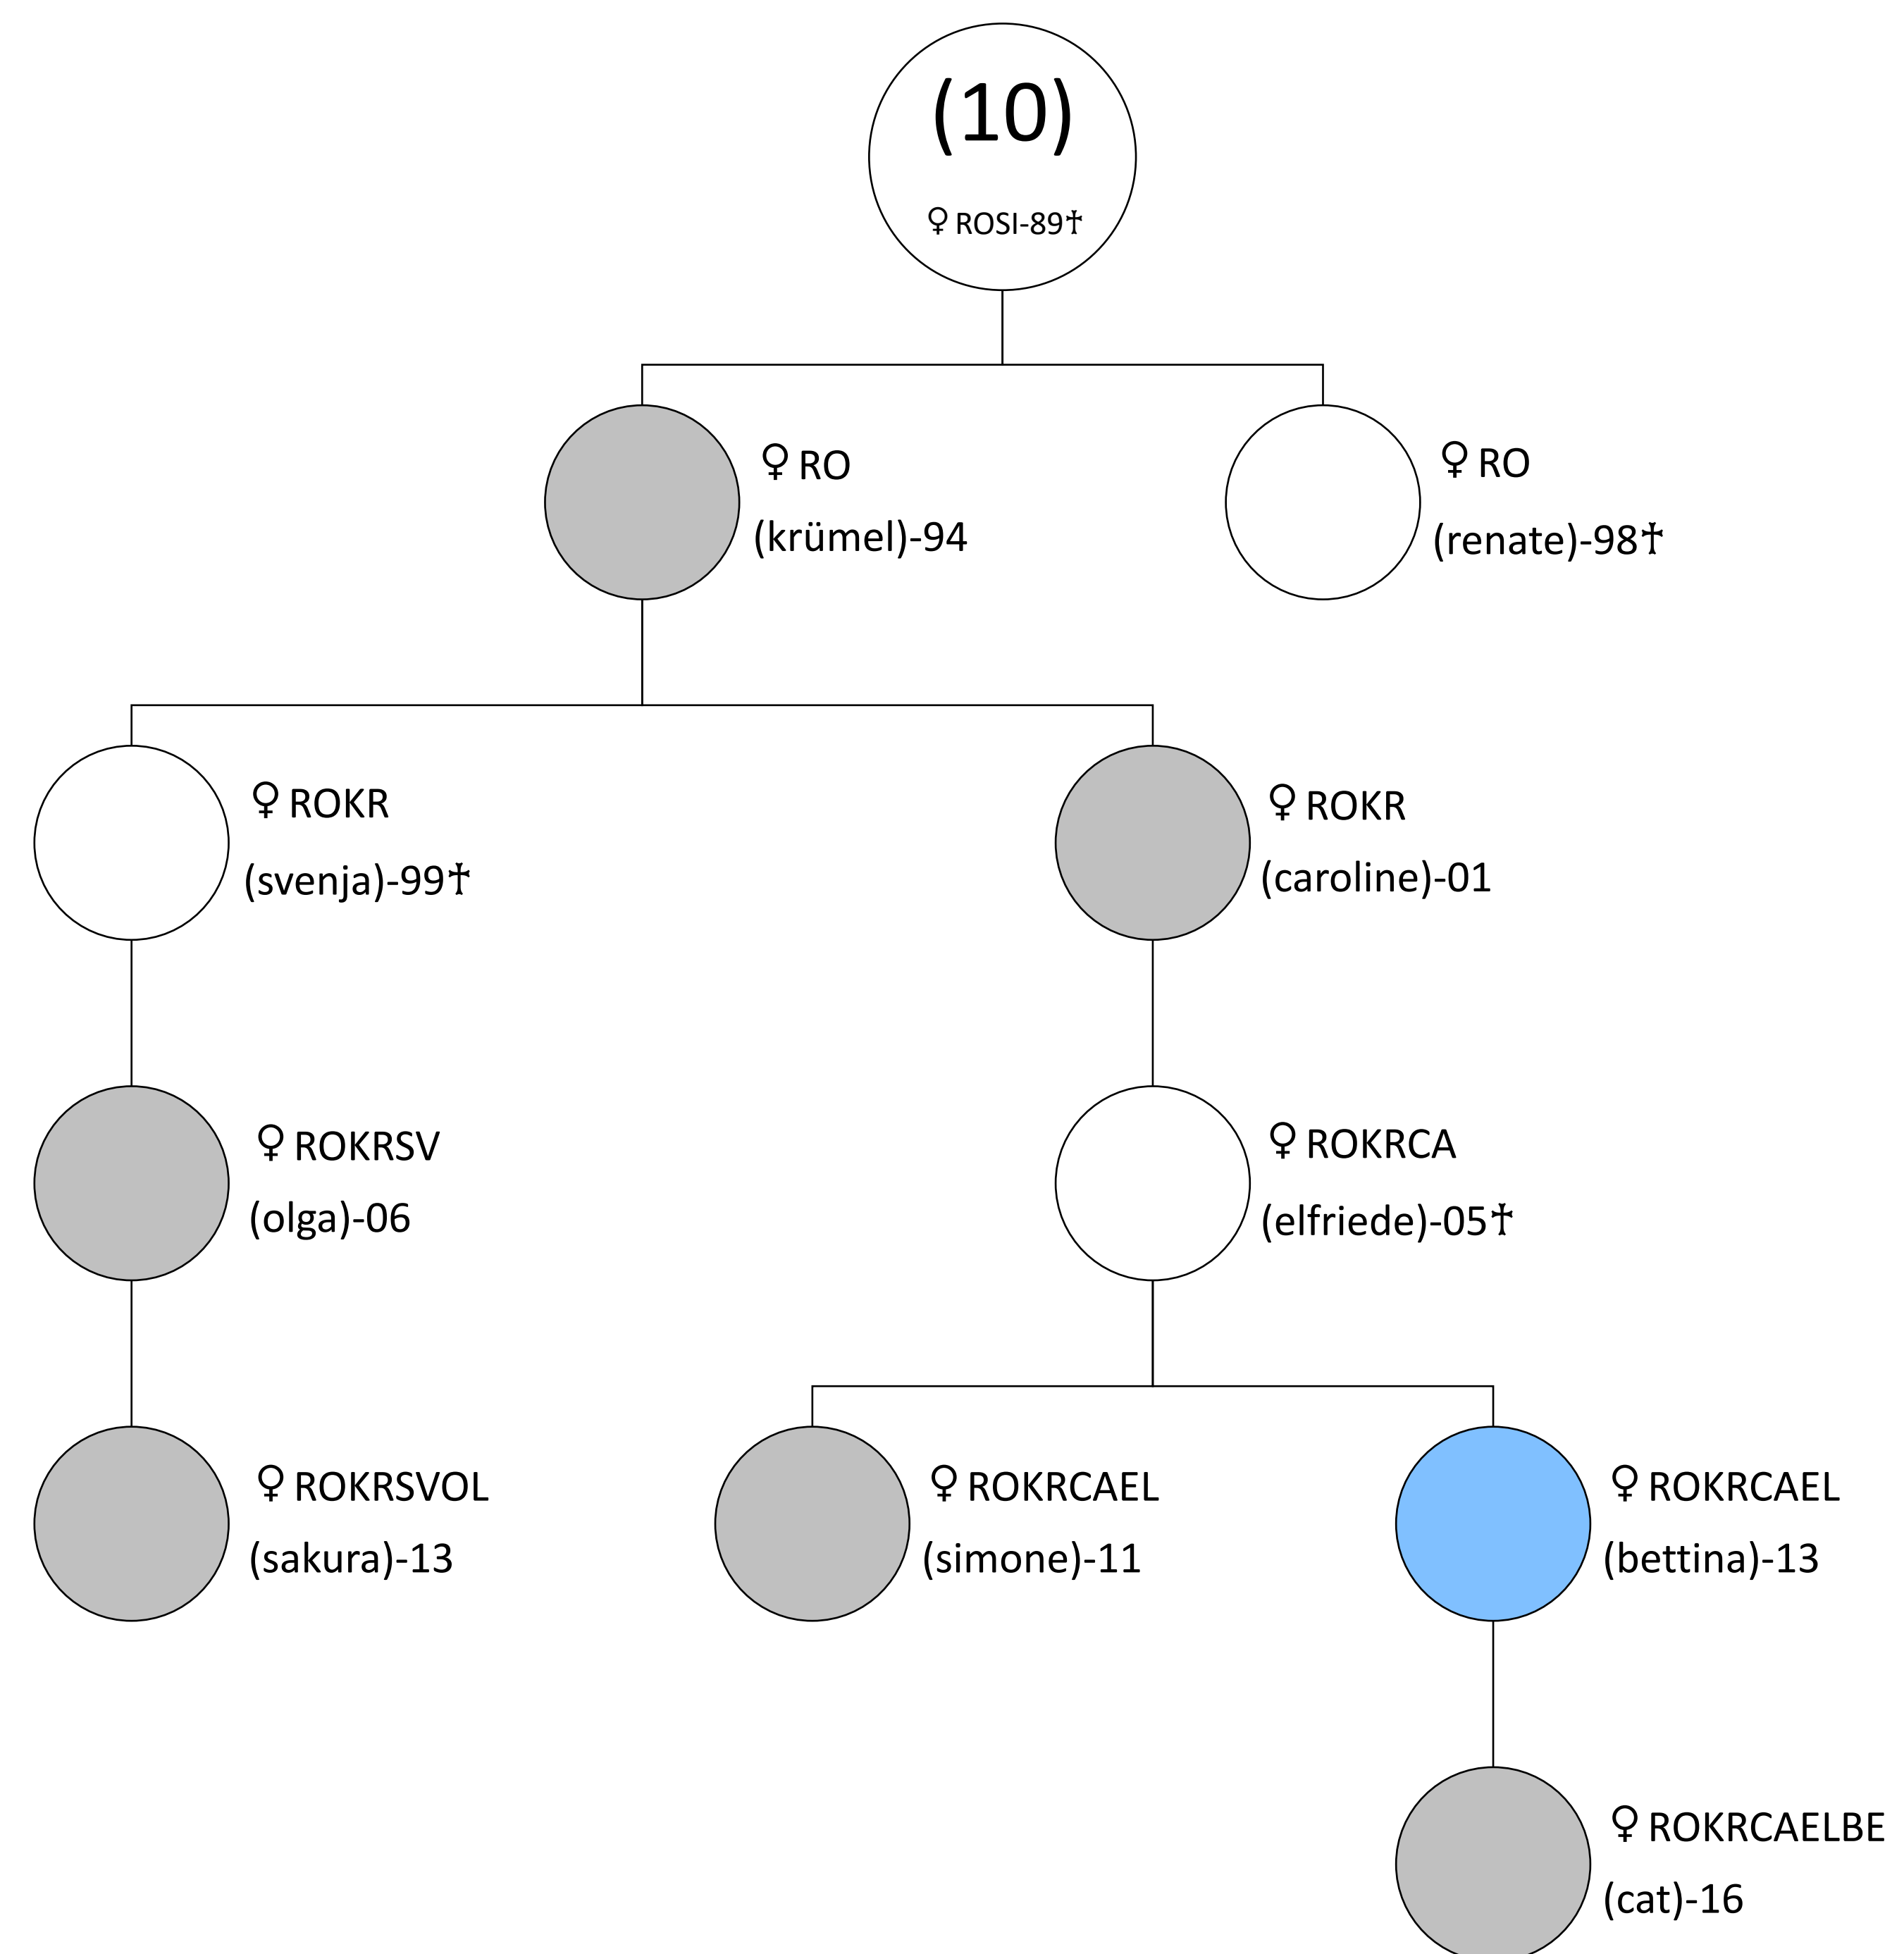

e)

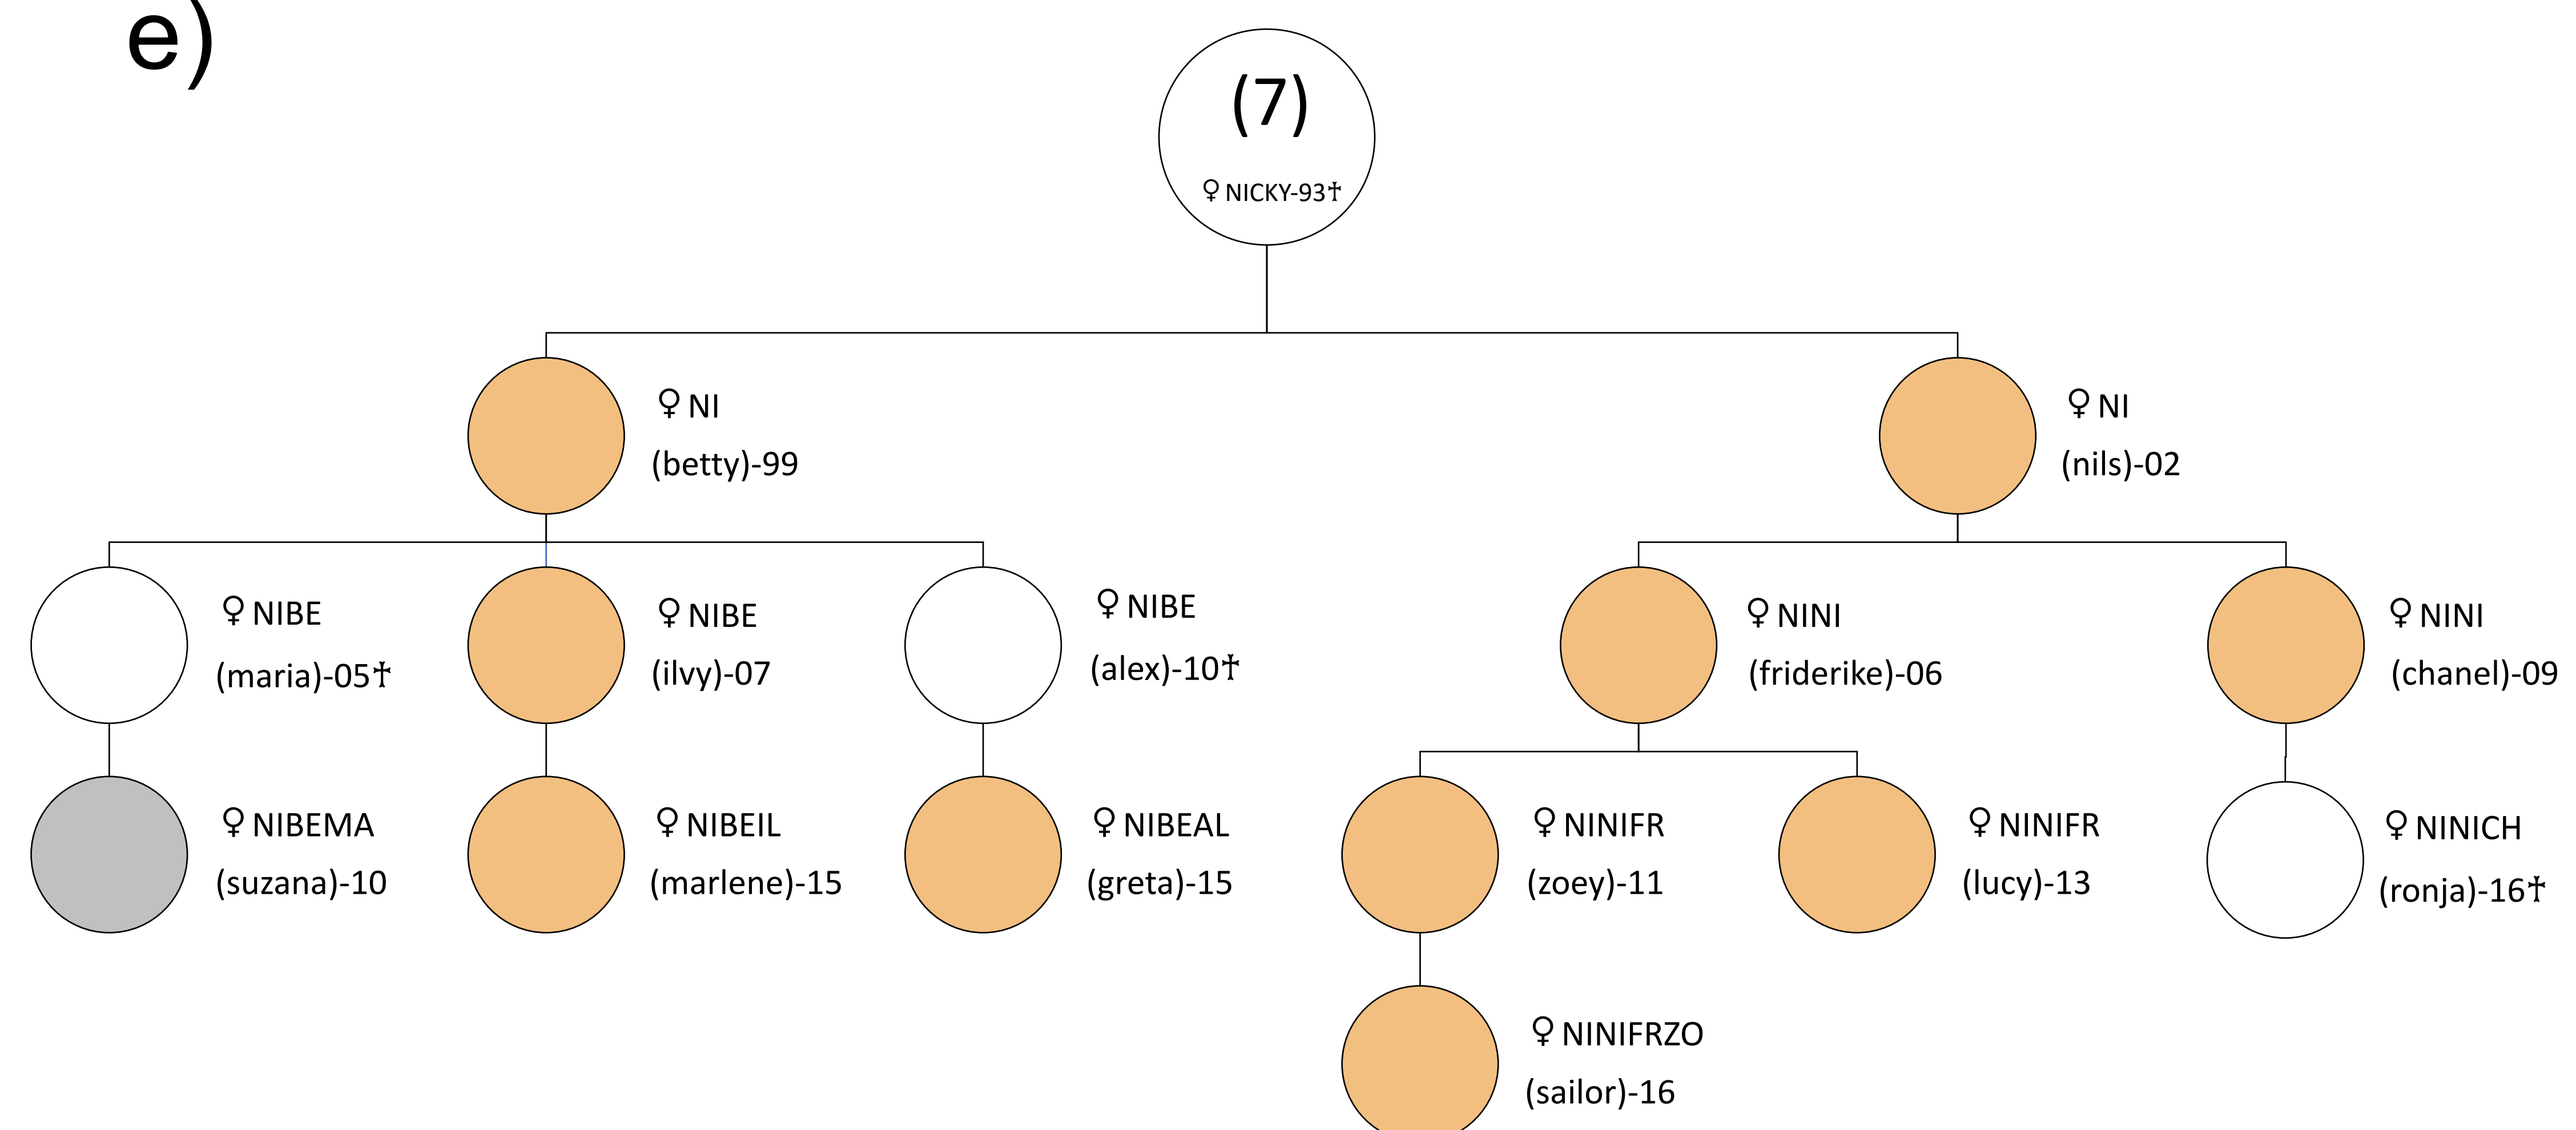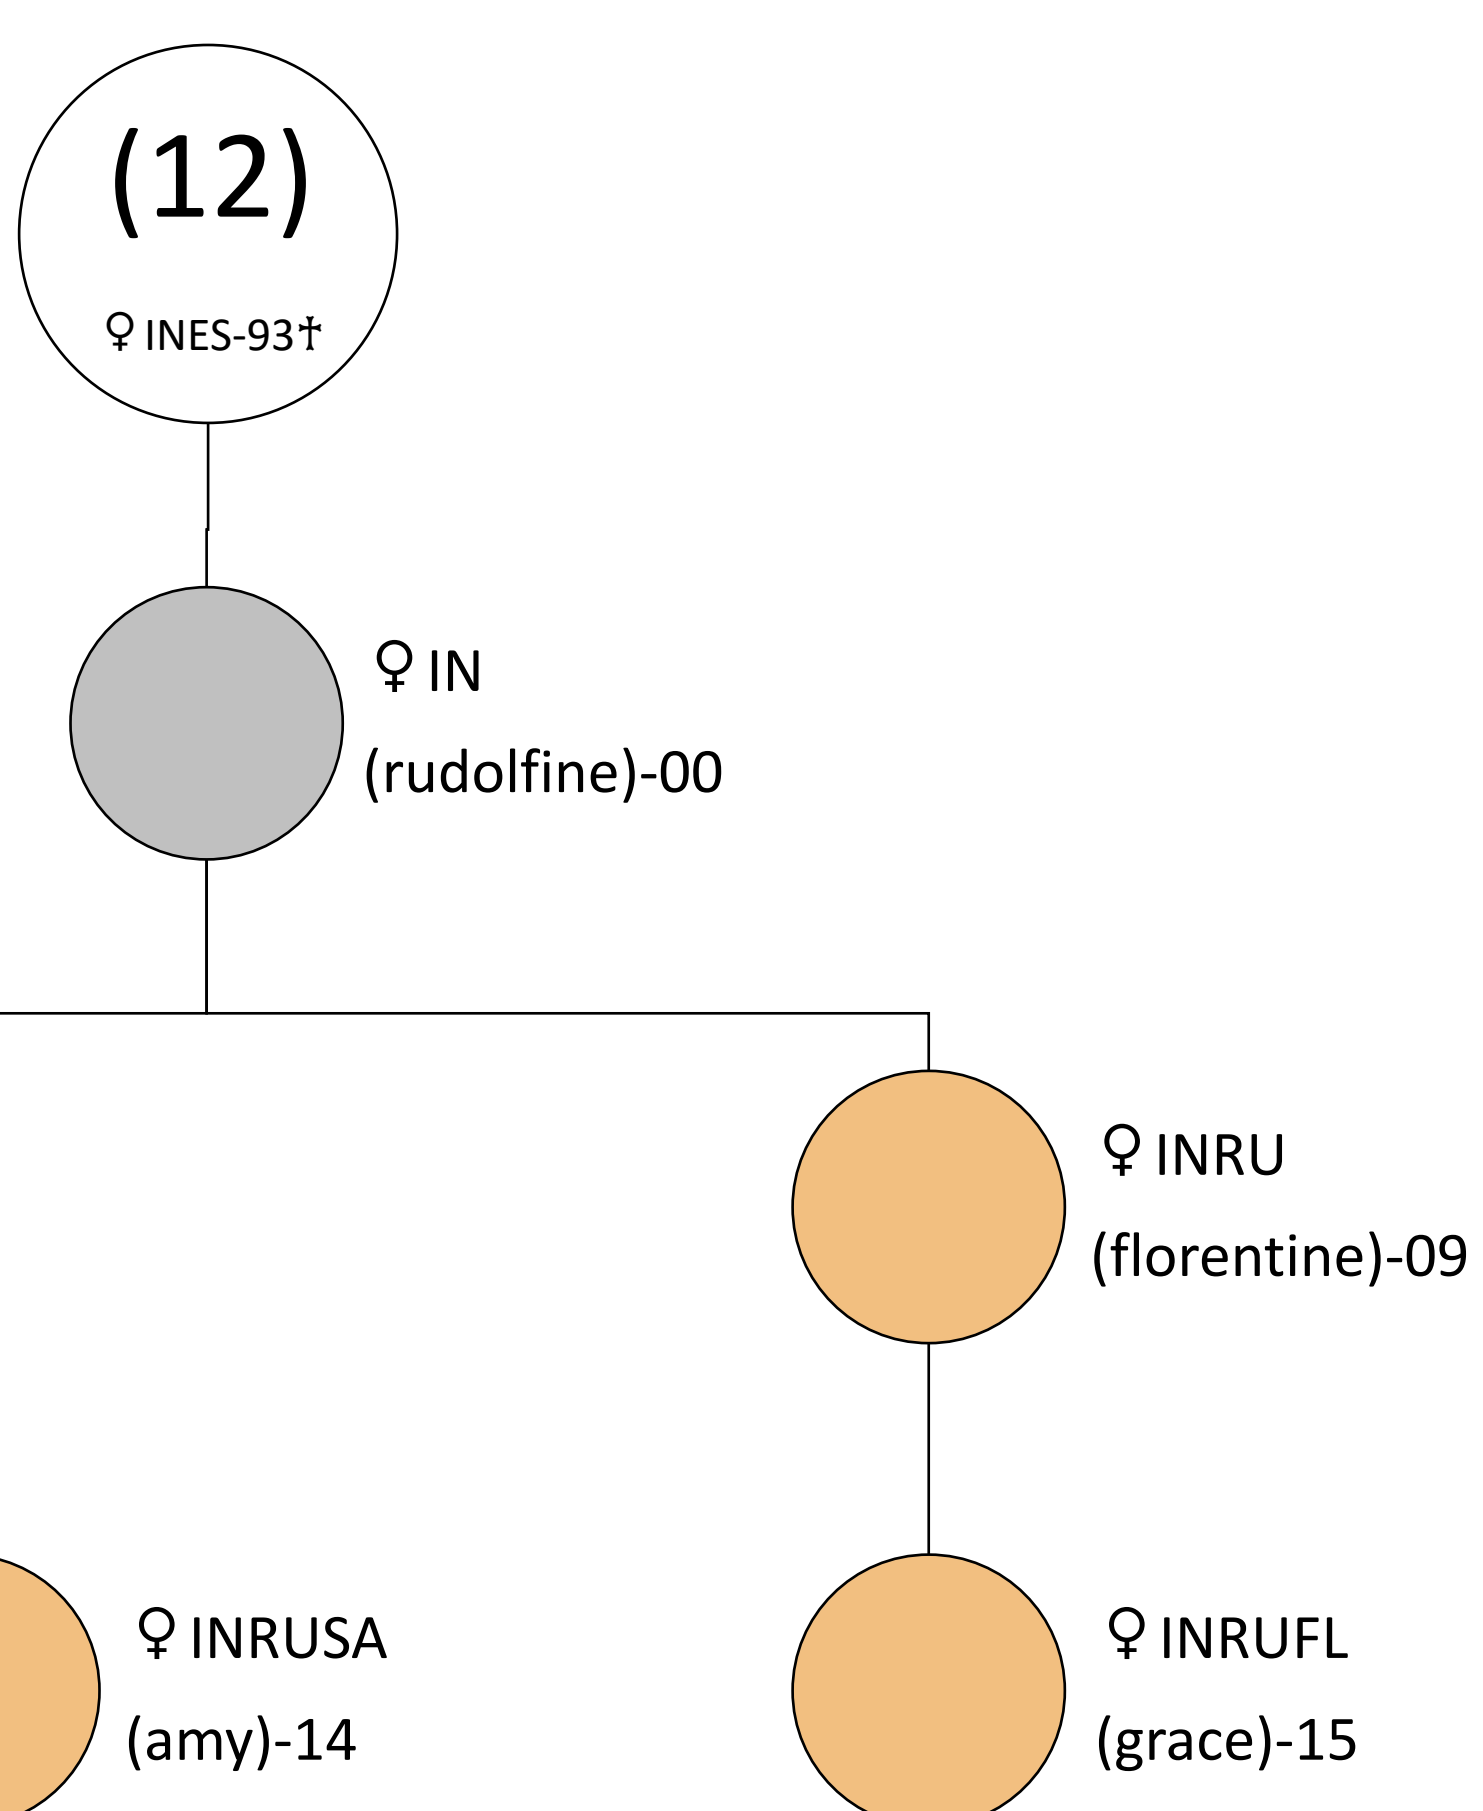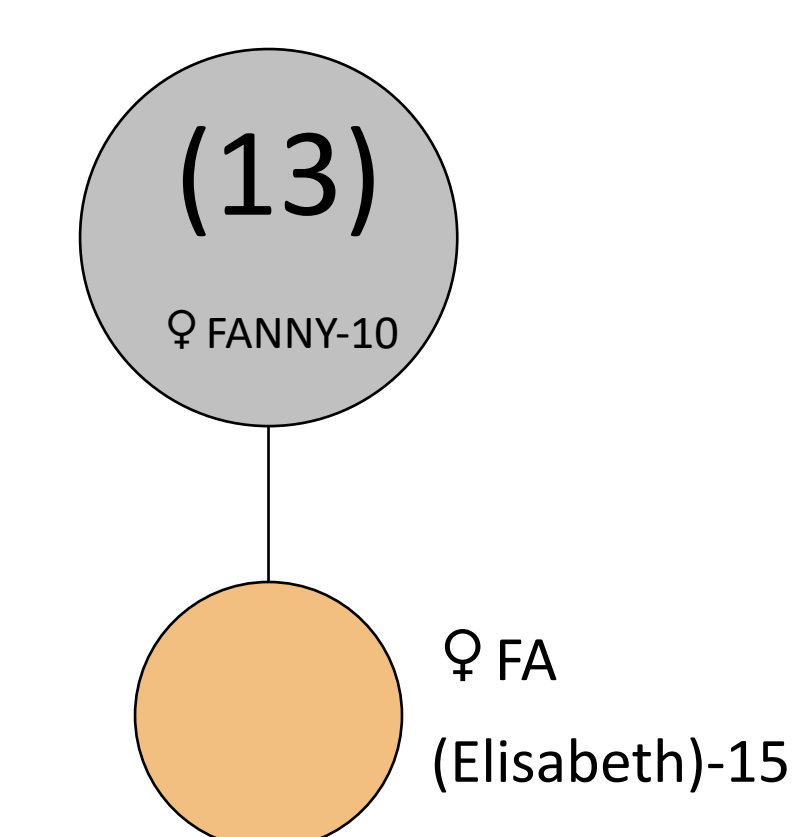

Supplement: AJP-85-0-s008.pdf [file AJP-85-0-s008.pdf]
